# Supplementary material
Source: publisher site journal article supplement (https://static.cambridge.org/content/id/urn:cambridge.org:id:article:S0008347X18000639/resource/name/S0008347X18000639supp001.xlsx)
Supplement: Supplementary file 1 [file S0008347X18000639supp001.xlsx]

## Sheet: Table S1
Supplementary Table S1. Collection localities of canola flower galls to determine midge and parasitoid emergence and diapause extent
Site	Year(s)	Latitude	Longitude
Prince Albert	2014	53.2199	-105.688
Melfort West	2014	52.8337	-104.713
Shannon Lake	2014	52.6607	-105.456
Yellow Creek	2014	52.7556	-105.247
Meadow Lake	2015	54.1001	-108.515
Choiceland	2015	53.4806	-104.487
Domremy	2015	52.7929	-105.726
Carrot River	2014–2015	53.2224	-103.276
Ridgedale	2014–2015	53.0462	-104.195
Codette	2014–2015	53.2495	-103.977
Nipawin	2014–2015	53.2802	-103.873
Fairy Glen	2014–2015	53.0442	-104.547
Gronlid	2014–2015	53.1039	-104.459
Melfort	2014–2015	52.8267	-104.598
Melfort Slough	2014–2015	52.7911	-104.913

## Sheet: TableS2
Supplementary Table S2. Collection localities of C. brassicola. Larvae were collected in canola flower galls and adults were collected in soil-emergence cages.
Site	Province	Latitude	Longitude	Lifestage	Number of specimens sequenced
Consort	Alberta	52.0549	-110.695	Larvae	3
Hairy Hill	Alberta	53.7442	-112.058	Larvae	3
Hardisty	Alberta	52.727	-111.335	Larvae	1
Irma	Alberta	52.9454	-111.213	Larvae	3
Kinsella	Alberta	53.1027	-111.346	Larvae	2
Lavoy	Alberta	53.4251	-111.882	Larvae	1
Mannville	Alberta	53.1323	-111.219	Larvae	3
Marwayne	Alberta	53.5228	-110.325	Larvae	3
Myrnam	Alberta	53.5414	-111.204	Larvae	3
Provost	Alberta	52.303	-110.124	Larvae	3
Roros	Alberta	52.8586	-110.367	Larvae	3
Vilna	Alberta	54.0969	-111.902	Larvae	3
Wainwright	Alberta	52.8564	-110.781	Larvae	3
Carrot River (2016)	Saskatchewan	53.2236	-103.275	Adult	5
Carrot River (2013)	Saskatchewan	53.23	-103.25	Adult	3
Codette	Saskatchewan	53.2393	-103.95	Adult	7
Melfort	Saskatchewan	52.8269	-104.599	Adult	5
Ridgedale	Saskatchewan	53.0441	-104.236	Adult (6), Larva (1)	7
Smoky Burn (2013)	Saskatchewan	53.34	-103.35	Adult	1

## Sheet: TableS3
Supplementary Table S3. Haplotype codes used in Fig. 7 and in supplementary alignments, GenBank accessions (new accessions denoted with *), and shared identical haplotypes.
haplotype_name_in_tree_Figure_X	Representative_GenBank_Accession	haplotype_name_in_alignment	is_identical_to:
7_maculipennis_hap1	AB597014	AB597014_Contarinia_maculipennis	AB597016_Contarinia_maculipennis
			AB597017_Contarinia_maculipennis
			AB597018_Contarinia_maculipennis
			AB597026_Contarinia_maculipennis
			AB597027_Contarinia_maculipennis
			AB597028_Contarinia_maculipennis
3_maculipennis_hap2	AB597029	AB597029_Contarinia_maculipennis	AB597030_Contarinia_maculipennis
			AB597031_Contarinia_maculipennis
7_nasturtii_hap1	AY485372	AY485372_Contarinia_nasturtii	AY485373_Contarinia_nasturtii
			AY485374_Contarinia_nasturtii
			AY485375_Contarinia_nasturtii
			AY485376_Contarinia_nasturtii
			AY485377_Contarinia_nasturtii
			AY485378_Contarinia_nasturtii
7_nasturtii_hap2	EU812560	Contarinianasturtii_colony_1	Contarinianasturtii_colony_2
			Contarinianasturtii_colony_3
			Contarinianasturtii_colony_4
			Contarinianasturtii_colony_5
			Contarinianasturtii_colony_6
			EU812560_Contarinia_nasturtii
45_brassicola_hap1	MG922865*	CarrotRiverSK2016_1	CarrotRiverSK2016_2
			CarrotRiverSK2016_3
			CarrotRiverSK2016_4
			CarrotRiverSK2016_5
			CarrotRiverSK2013_1
			CarrotRiverSK2013_2
			CarrotRiverSK2013_3
			SmokyBurnSK2013
			CodetteSK_1
			CodetteSK_2
			CodetteSK_3
			CodetteSK_4
			CodetteSK_5
			ConsortAB_1
			ConsortAB_3
			ConsortAB_2
			HairyHillAB_1
			HairyHillAB_2
			HairyHillAB_3
			HardistyAB
			IrmaAB_3
			KinsellaAB_1
			KinsellaAB_2
			MannvilleAB_1
			MannvilleAB_2
			MelfortSK_1
			MelfortSK_2
			MelfortSK_3
			MelfortSK_4
			MelfortSK_5
			MyrnamAB_1
			MyrnamAB_2
			ProvostAB_2
			ProvostAB_3
			ProvostAB_1
			RidgedaleSK_1
			RidgedaleSK_2
			RidgedaleSK_3
			RidgedaleSK_4
			RidgedaleSK_5
			RorosAB_1
			RorosAB_2
			VilnaAB_1
			VilnaAB_2
3_brassicola_hap2	MG922868*	IrmaAB_1	IrmaAB_2
			RidgedaleSK_6
2_brassicola_hap3	MG922869*	LavoyAB	MarwayneAB_2
2_brassicola_hap4	MG922871*	MarwayneAB_1	VilnaAB_3
3_brassicola_hap5	MG922876*	WainwrightAB_1	WainwrightAB_2
			WainwrightAB_3
brassicola_hap6	MG922870*	MannvilleAB_3	na
brassicola_hap7	MG922867*	CodetteSK_7	na
brassicola_hap8	MG922873*	MyrnamAB_3	na
brassicola_hap9	MG922866*	CodetteSK_6	na
brassicola_hap10	MG922874*	RidgedaleSK_7	na
brassicola_hap11	MG922872*	MarwayneAB_3	na
brassicola_hap12	MG922875*	RorosAB_3	na

## Sheet: Table S4
Supplementary Table S4. Full alignment of COI data (from phylip format). See Supplementary Table S3 to match individual IDs to haplotype IDs as presented in Figure 7.
103	439
AB597014_Contarinia_maculipennis	AGGATGTCCAAAAAATCAAAATAAATGTTGATAAAGAATAGGATCTCCTCCTCCTATTGGATCAAAGAATGAAGTATTTAAATTTCGATCTGTGAGTAATATAGTAATAGCTCCCGCTAGAACTGGAAGAGATAATAAAAGAAGAATCGTTGTAATTAAAATTGATCAAATAAATAAAGAAATTTGATCAAATTTTAAATATTTAATTTTTATATTAATTATTGTTGAAATAAAATTAATAGCTCCTAAAATTGATGAAATTCCTGCAATATGTAAAGAAAAAATAGAAAAATCTACAGATGTCCCTGTATGAGCAATAATAGAAGAAAGAGGAGGATAAACAGTTCATCCTGTTCCTGTTCCTGTTTCTACTATTCTTCTAATTAAAAGTAATGAAAT…
AB597015_Contarinia_maculipennis	AGGATGTCCAAAAAATCAAAATAAATGTTGATAAAGAATAGGATCTCCTCCTCCTATTGGATCAAAGAATGAAGTGTTTAAATTTCGATCTGTTAGTAATATAGTAATAGCTCCTGCTAGAACTGGAAGAGATAATAAAAGAAGAATTGTTGTAATTAAAATTGATCAAATAAATAAAGAAATTTGATCAAATTTTAAATATTTAATTTTTATATTAATTATTGTTGAAATAAAATTAATAGCTCCTAAAATTGATGAAATTCCTGCAATATGTAAAGAAAAAATAGAAAAATCTACAGATGTTCCTGTATGAGCAATAATAGAAGAAAGAGGAGGATAAACAGTTCATCCTGTTCCTGTTCCAGTTTCTACTATTCTTCTAATTAAAAGTAATGAAAT…
AB597016_Contarinia_maculipennis	AGGATGTCCAAAAAATCAAAATAAATGTTGATAAAGAATAGGATCTCCTCCTCCTATTGGATCAAAGAATGAAGTATTTAAATTTCGATCTGTGAGTAATATAGTAATAGCTCCCGCTAGAACTGGAAGAGATAATAAAAGAAGAATCGTTGTAATTAAAATTGATCAAATAAATAAAGAAATTTGATCAAATTTTAAATATTTAATTTTTATATTAATTATTGTTGAAATAAAATTAATAGCTCCTAAAATTGATGAAATTCCTGCAATATGTAAAGAAAAAATAGAAAAATCTACAGATGTCCCTGTATGAGCAATAATAGAAGAAAGAGGAGGATAAACAGTTCATCCTGTTCCTGTTCCTGTTTCTACTATTCTTCTAATTAAAAGTAATGAAAT…
AB597017_Contarinia_maculipennis	AGGATGTCCAAAAAATCAAAATAAATGTTGATAAAGAATAGGATCTCCTCCTCCTATTGGATCAAAGAATGAAGTATTTAAATTTCGATCTGTGAGTAATATAGTAATAGCTCCCGCTAGAACTGGAAGAGATAATAAAAGAAGAATCGTTGTAATTAAAATTGATCAAATAAATAAAGAAATTTGATCAAATTTTAAATATTTAATTTTTATATTAATTATTGTTGAAATAAAATTAATAGCTCCTAAAATTGATGAAATTCCTGCAATATGTAAAGAAAAAATAGAAAAATCTACAGATGTCCCTGTATGAGCAATAATAGAAGAAAGAGGAGGATAAACAGTTCATCCTGTTCCTGTTCCTGTTTCTACTATTCTTCTAATTAAAAGTAATGAAAT…
AB597018_Contarinia_maculipennis	AGGATGTCCAAAAAATCAAAATAAATGTTGATAAAGAATAGGATCTCCTCCTCCTATTGGATCAAAGAATGAAGTATTTAAATTTCGATCTGTGAGTAATATAGTAATAGCTCCCGCTAGAACTGGAAGAGATAATAAAAGAAGAATCGTTGTAATTAAAATTGATCAAATAAATAAAGAAATTTGATCAAATTTTAAATATTTAATTTTTATATTAATTATTGTTGAAATAAAATTAATAGCTCCTAAAATTGATGAAATTCCTGCAATATGTAAAGAAAAAATAGAAAAATCTACAGATGTCCCTGTATGAGCAATAATAGAAGAAAGAGGAGGATAAACAGTTCATCCTGTTCCTGTTCCTGTTTCTACTATTCTTCTAATTAAAAGTAATGAAAT…
AB597026_Contarinia_maculipennis	AGGATGTCCAAAAAATCAAAATAAATGTTGATAAAGAATAGGATCTCCTCCTCCTATTGGATCAAAGAATGAAGTATTTAAATTTCGATCTGTGAGTAATATAGTAATAGCTCCCGCTAGAACTGGAAGAGATAATAAAAGAAGAATCGTTGTAATTAAAATTGATCAAATAAATAAAGAAATTTGATCAAATTTTAAATATTTAATTTTTATATTAATTATTGTTGAAATAAAATTAATAGCTCCTAAAATTGATGAAATTCCTGCAATATGTAAAGAAAAAATAGAAAAATCTACAGATGTCCCTGTATGAGCAATAATAGAAGAAAGAGGAGGATAAACAGTTCATCCTGTTCCTGTTCCTGTTTCTACTATTCTTCTAATTAAAAGTAATGAAAT…
AB597027_Contarinia_maculipennis	AGGATGTCCAAAAAATCAAAATAAATGTTGATAAAGAATAGGATCTCCTCCTCCTATTGGATCAAAGAATGAAGTATTTAAATTTCGATCTGTGAGTAATATAGTAATAGCTCCCGCTAGAACTGGAAGAGATAATAAAAGAAGAATCGTTGTAATTAAAATTGATCAAATAAATAAAGAAATTTGATCAAATTTTAAATATTTAATTTTTATATTAATTATTGTTGAAATAAAATTAATAGCTCCTAAAATTGATGAAATTCCTGCAATATGTAAAGAAAAAATAGAAAAATCTACAGATGTCCCTGTATGAGCAATAATAGAAGAAAGAGGAGGATAAACAGTTCATCCTGTTCCTGTTCCTGTTTCTACTATTCTTCTAATTAAAAGTAATGAAAT…
AB597028_Contarinia_maculipennis	AGGATGTCCAAAAAATCAAAATAAATGTTGATAAAGAATAGGATCTCCTCCTCCTATTGGATCAAAGAATGAAGTATTTAAATTTCGATCTGTGAGTAATATAGTAATAGCTCCCGCTAGAACTGGAAGAGATAATAAAAGAAGAATCGTTGTAATTAAAATTGATCAAATAAATAAAGAAATTTGATCAAATTTTAAATATTTAATTTTTATATTAATTATTGTTGAAATAAAATTAATAGCTCCTAAAATTGATGAAATTCCTGCAATATGTAAAGAAAAAATAGAAAAATCTACAGATGTCCCTGTATGAGCAATAATAGAAGAAAGAGGAGGATAAACAGTTCATCCTGTTCCTGTTCCTGTTTCTACTATTCTTCTAATTAAAAGTAATGAAAT…
AB597029_Contarinia_maculipennis	AGGATGTCCAAAAAATCAAAATAAATGTTGATAAAGAATAGGATCTCCTCCTCCTATTGGATCAAAGAATGAAGTGTTTAAATTTCGATCTGTTAGTAATATAGTAATAGCTCCTGCTAGAACTGGAAGAGATAATAAAAGAAGAATCGTTGTAATTAAAATTGATCAAATAAATAAAGAAATTTGATCAAATTTTAAATATTTAATTTTTATATTAATTATTGTTGAAATAAAATTAATAGCTCCTAAAATTGATGAAATTCCTGCAATATGTAAAGAAAAAATAGAAAAATCTACAGATGTTCCTGTATGAGCAATAATAGAAGAAAGAGGAGGATAAACAGTTCATCCTGTTCCTGTTCCAGTTTCTACTATTCTTCTAATTAAAAGTAATGAAAT…
AB597030_Contarinia_maculipennis	AGGATGTCCAAAAAATCAAAATAAATGTTGATAAAGAATAGGATCTCCTCCTCCTATTGGATCAAAGAATGAAGTGTTTAAATTTCGATCTGTTAGTAATATAGTAATAGCTCCTGCTAGAACTGGAAGAGATAATAAAAGAAGAATCGTTGTAATTAAAATTGATCAAATAAATAAAGAAATTTGATCAAATTTTAAATATTTAATTTTTATATTAATTATTGTTGAAATAAAATTAATAGCTCCTAAAATTGATGAAATTCCTGCAATATGTAAAGAAAAAATAGAAAAATCTACAGATGTTCCTGTATGAGCAATAATAGAAGAAAGAGGAGGATAAACAGTTCATCCTGTTCCTGTTCCAGTTTCTACTATTCTTCTAATTAAAAGTAATGAAAT…
AB597031_Contarinia_maculipennis	AGGATGTCCAAAAAATCAAAATAAATGTTGATAAAGAATAGGATCTCCTCCTCCTATTGGATCAAAGAATGAAGTGTTTAAATTTCGATCTGTTAGTAATATAGTAATAGCTCCTGCTAGAACTGGAAGAGATAATAAAAGAAGAATCGTTGTAATTAAAATTGATCAAATAAATAAAGAAATTTGATCAAATTTTAAATATTTAATTTTTATATTAATTATTGTTGAAATAAAATTAATAGCTCCTAAAATTGATGAAATTCCTGCAATATGTAAAGAAAAAATAGAAAAATCTACAGATGTTCCTGTATGAGCAATAATAGAAGAAAGAGGAGGATAAACAGTTCATCCTGTTCCTGTTCCAGTTTCTACTATTCTTCTAATTAAAAGTAATGAAAT…
AY485369_Contarinia_tritici	AGGATGTCCAAAAAATCAAAATAAATGTTGATAAAGAACTGGATCTCCCCCTCCTATTGGATCAAAAAAAGATGTATTTAAATTTCGATCAGTTAATAATATTGTGATTGCTCCTGCTAAAACTGGTAAAGAAAGTAAAAGAAGAATTGTTGTAATTAAGATTGATCAAATGAATAATGAAATTTGGTCAAATTTTAAAAATTTAATTTTTATATTTATTATTGTAGAAATAAAATTAATTGCTCCCAAAATTGAGGAAATCCCAGCAATATGAAGAGAAAAAATAGAAAAATCTACAGATGTTCCTGTGTGAGCAATAATAGAAGAAAGAGGAGGGTAGACTGTTCAACCTGTTCCAGTTCCAGTTTCTACTATTCTTCTAATTAATAATAAAGAAAT…
AY485370_Contarinia_nasturtii	AGGATGTCCAAAAAATCAAAATAAATGTTGATAAAGAATTGGATCTCCTCCTCCTATTGGATCAAAGAATGAAGTATTTAAATTTCGATCAGTTAATAATATAGTAATTGCTCCTGCTAAAACAGGTAATGATAATAAAAGAAGAATAGTAGTAATCAAAATAGATCAAATAAATAGTGAAATTTGATCAAATTTTAAAAATTTAATTTTTATATTTAATATAGTAGAAATAAAATTAATTGCTCCTAAAATAGATGAAATTCCTGCAATATGTAAAGAAAAAATTGAAAAATCAACTGATGTTCCAGTATGTGCAATAATTGAAGAAAGAGGGGGGTAAACAGTTCATCCAGTTCCAGTTCCTGTTTCTACTATTCTTCTAATTAAAAGAAGTGTGAT…
AY485371_Contarinia_nasturtii	AGGATGTCCAAAAAATCAAAATAAATGTTGATAAAGAATTGGATCTCCTCCTCCTATTGGATCAAAGAATGAAGTATTTAAATTTCGATCAGTTAATAATATAGTAATTGCTCCTGCTAAAACAGGTAGTGATAATAAAAGAAGAATAGTAGTAATTAAAATAGATCAAATAAATAGTGAAATTTGATCAAATTTTAAAAATTTAATTTTTATATTTAATATAGTAGAAATAAAATTAATTGCTCCTAAAATAGATGAAATTCCTGCAATATGTAAAGAAAAAATTGAAAAATCAACTGATGTTCCAGTATGTGCAATAATTGAAGAAAGAGGGGGGTAAACAGTTCATCCAGTTCCAGTTCCTGTTTCTACTATTCTTCTAATTAAAAGAAGTGTAAT…
AY485372_Contarinia_nasturtii	AGGATGTCCAAAAAATCAAAATAAATGTTGATAAAGAATTGGATCTCCTCCTCCTATTGGATCAAAGAATGAAGTATTTAAATTTCGATCAGTTAATAATATAGTAATTGCTCCTGCTAAAACAGGTAGTGATAATAAAAGAAGAATAGTAGTAATTAAAATAGATCAAATAAATAGTGAAATTTGATCAAATTTTAAAAATTTAATTTTTATATTTAATATAGTAGAAATAAAATTAATTGCTCCTAAAATAGATGAAATTCCTGCAATATGTAAAGAAAAAATTGAAAAATCAACTGATGTTCCAGTATGTGCAATAATTGAAGAAAGAGGGGGGTAAACAGTTCATCCAGTTCCAGTTCCTGTTTCTACTATTCTTCTAATTAAAAGAAGTGTAAT…
AY485373_Contarinia_nasturtii	AGGATGTCCAAAAAATCAAAATAAATGTTGATAAAGAATTGGATCTCCTCCTCCTATTGGATCAAAGAATGAAGTATTTAAATTTCGATCAGTTAATAATATAGTAATTGCTCCTGCTAAAACAGGTAGTGATAATAAAAGAAGAATAGTAGTAATTAAAATAGATCAAATAAATAGTGAAATTTGATCAAATTTTAAAAATTTAATTTTTATATTTAATATAGTAGAAATAAAATTAATTGCTCCTAAAATAGATGAAATTCCTGCAATATGTAAAGAAAAAATTGAAAAATCAACTGATGTTCCAGTATGTGCAATAATTGAAGAAAGAGGGGGGTAAACAGTTCATCCAGTTCCAGTTCCTGTTTCTACTATTCTTCTAATTAAAAGAAGTGTAAT…
AY485374_Contarinia_nasturtii	AGGATGTCCAAAAAATCAAAATAAATGTTGATAAAGAATTGGATCTCCTCCTCCTATTGGATCAAAGAATGAAGTATTTAAATTTCGATCAGTTAATAATATAGTAATTGCTCCTGCTAAAACAGGTAGTGATAATAAAAGAAGAATAGTAGTAATTAAAATAGATCAAATAAATAGTGAAATTTGATCAAATTTTAAAAATTTAATTTTTATATTTAATATAGTAGAAATAAAATTAATTGCTCCTAAAATAGATGAAATTCCTGCAATATGTAAAGAAAAAATTGAAAAATCAACTGATGTTCCAGTATGTGCAATAATTGAAGAAAGAGGGGGGTAAACAGTTCATCCAGTTCCAGTTCCTGTTTCTACTATTCTTCTAATTAAAAGAAGTGTAAT…
AY485375_Contarinia_nasturtii	AGGATGTCCAAAAAATCAAAATAAATGTTGATAAAGAATTGGATCTCCTCCTCCTATTGGATCAAAGAATGAAGTATTTAAATTTCGATCAGTTAATAATATAGTAATTGCTCCTGCTAAAACAGGTAGTGATAATAAAAGAAGAATAGTAGTAATTAAAATAGATCAAATAAATAGTGAAATTTGATCAAATTTTAAAAATTTAATTTTTATATTTAATATAGTAGAAATAAAATTAATTGCTCCTAAAATAGATGAAATTCCTGCAATATGTAAAGAAAAAATTGAAAAATCAACTGATGTTCCAGTATGTGCAATAATTGAAGAAAGAGGGGGGTAAACAGTTCATCCAGTTCCAGTTCCTGTTTCTACTATTCTTCTAATTAAAAGAAGTGTAAT…
AY485376_Contarinia_nasturtii	AGGATGTCCAAAAAATCAAAATAAATGTTGATAAAGAATTGGATCTCCTCCTCCTATTGGATCAAAGAATGAAGTATTTAAATTTCGATCAGTTAATAATATAGTAATTGCTCCTGCTAAAACAGGTAGTGATAATAAAAGAAGAATAGTAGTAATTAAAATAGATCAAATAAATAGTGAAATTTGATCAAATTTTAAAAATTTAATTTTTATATTTAATATAGTAGAAATAAAATTAATTGCTCCTAAAATAGATGAAATTCCTGCAATATGTAAAGAAAAAATTGAAAAATCAACTGATGTTCCAGTATGTGCAATAATTGAAGAAAGAGGGGGGTAAACAGTTCATCCAGTTCCAGTTCCTGTTTCTACTATTCTTCTAATTAAAAGAAGTGTAAT…
AY485377_Contarinia_nasturtii	AGGATGTCCAAAAAATCAAAATAAATGTTGATAAAGAATTGGATCTCCTCCTCCTATTGGATCAAAGAATGAAGTATTTAAATTTCGATCAGTTAATAATATAGTAATTGCTCCTGCTAAAACAGGTAGTGATAATAAAAGAAGAATAGTAGTAATTAAAATAGATCAAATAAATAGTGAAATTTGATCAAATTTTAAAAATTTAATTTTTATATTTAATATAGTAGAAATAAAATTAATTGCTCCTAAAATAGATGAAATTCCTGCAATATGTAAAGAAAAAATTGAAAAATCAACTGATGTTCCAGTATGTGCAATAATTGAAGAAAGAGGGGGGTAAACAGTTCATCCAGTTCCAGTTCCTGTTTCTACTATTCTTCTAATTAAAAGAAGTGTAAT…
AY485378_Contarinia_nasturtii	AGGATGTCCAAAAAATCAAAATAAATGTTGATAAAGAATTGGATCTCCTCCTCCTATTGGATCAAAGAATGAAGTATTTAAATTTCGATCAGTTAATAATATAGTAATTGCTCCTGCTAAAACAGGTAGTGATAATAAAAGAAGAATAGTAGTAATTAAAATAGATCAAATAAATAGTGAAATTTGATCAAATTTTAAAAATTTAATTTTTATATTTAATATAGTAGAAATAAAATTAATTGCTCCTAAAATAGATGAAATTCCTGCAATATGTAAAGAAAAAATTGAAAAATCAACTGATGTTCCAGTATGTGCAATAATTGAAGAAAGAGGGGGGTAAACAGTTCATCCAGTTCCAGTTCCTGTTTCTACTATTCTTCTAATTAAAAGAAGTGTAAT…
AY485379_Contarinia_nasturtii	AGGATGTCCAAAAAATCAAAATAAATGTTGATAAAGAATTGGATCTCCTCCTCCTATTGGATCAAAGAATGAAGTATTTAAATTTCGATCAGTTAATAATATAGTAATTGCTCCTGCTAAAACAGGTAATGATAATAAAAGAAGAATAGTAGTAATCAAAATAGATCAAATAAATAGTGAAATTTGATCAAATTTTAAAAATTTAATTTTTATATTTAATATAGTAGAAATAAAATTAATTGCTCCTAAAATAGATGAAATTCCTGCAATATGTAAAGAAAAAATTAAAAAATCAACTGATGTTCCAGTATGTGCAATAATTGAAGAAAGAGGGGGGTAAACAGTTCATCCAGTTCCAGTTCCTGTTTCTACTATTCTTCTAATTAAAAGAAGTGTGAT…
AY485380_Contarinia_nasturtii	AGGATGTCCAAAAAATCAAAATAAATGTTGATAAAGAATTGGATCTCCTCCTCCTATTGGATCAAAGAATGAAGTATTTAAATTTCGATCAGTTAATAATATAGTAATTGCTCCTGCTAAAACAGGTAGTGATAATAAAAGAAGAATAGTAGTAATTAAAATAGATCAAATAAATAGTGAAATTTGATCAAATTTTAAAAATTTAATTTTTATATTTAATATAGTAGAAATAAAATTAATTGCTCCTAAAATAGATGAAATTCCTGCAATATGTAAAGAAAAAATTAAAAAATCAACTGATGTTCCAGTATGTGCAATAATTGAAGAAAGAGGGGGGTAAACAGTTCATCCAGTTCCAGTTCCTGTTTCTACTATTCTTCTAATTAAAAGAAGTGTGAT…
AY485381_Contarinia_pisi	AGGGTGACCAAAAAATCAAAATAAATGTTGATAAAGAATTGGGTCTCCTCCTCCTATAGGATCAAAAAAAGAAGTATTTATATTTCGATCAGTTAATAATATAGTAATTGCTCCAGCTAGAACTGGTAAAGATAAAAGAAGAAGAATAGTAGTGATTATAATAGATCAAATAAATAATGAAATTTGATCAAATTTTAAAAATTTAATTTTTATATTTAATATAGTAGAAATGAAATTAATTGCTCCTAAAATAGATGAAATACCTGCAATATGTAAAGAAAAAATTGAAAAATCAACAGATGTTCCTGTGTGGGCGATAATTGAAGAAAGAGGGGGGTAAATAGTTCATCCAGTTCCAGTACCTGTTTCTACTATTCTTCTAATTAAAAGAAGTGTAAT…
AY485382_Contarinia_pisi	AGGGTGACCAAAAAATCAAAATAAATGTTGATAAAGAATTGGGTCTCCTCCTCCTATAGGATCAAAAAAAGAAGTATTTATATTTCGATCAGTTAATAATATAGTAATTGCTCCAGCTAGAACTGGTAAAGATAAAAGAAGAAGAATAGTAGTGATTATAATAGATCAAATAAATAATGAAATTTGATCAAATTTTAAAAATTTAATTTTTATATTTAATATAGTAGAAATGAAATTAATTGCTCCTAAAATAGATGAAATACCTGCAATATGTAAAGAAAAAATTGAAAAATCAACAGATGTTCCTGTGTGGGCGATAATTGAAGAAAGAGGGGGGTAAACAGTTCATCCAGTTCCAGTACCTGTTTCTACTATTCTTCTAATTAAAAGAAGTGTAAT…
AY485383_Contarinia_tritici	AGGATGCCCAAAAAATCAAAATAAATGTTGATAAAGAACTGGATCTCCTCCTCCTATTGGATCAAAAAAAGATGTATTTAAATTTCGATCAGTTAATAATATTGTGATTGCTCCTGCTAAAACTGGTAAAGAAAGTAAAAGAAGAATTGTTGTAATTAAAATTGATCAAATAAATAATGAAATTTGGTCAAATTTTAAAAATTTAATTTTTATATTTAATATTGTAGAAATAAAATTAATTGCTCCTAAAATTGAGGAAATTCCAGCAATATGAAGAGAAAAAATAGAAAAATCTACAGATGTTCCTGTGTGAGCAATAATAGAAGAAAGAGGAGGGTAGACTGTTCAACCTGTTCCAGTTCCAGTTTCTACTATTCTTCTAATTAATAATAAAGAAAT…
Contarinianasturtii_colony_1	AGGATGTCCAAAAAATCAAAATAAATGTTGATAAAGAATTGGATCTCCTCCTCCTATTGGATCAAAGAATGAAGTATTTAAATTTCGATCAGTTAATAATATAGTAATTGCTCCTGCTAAAACAGGTAGTGATAATAAAAGAAGAATAGTAGTAATTAAAATAGATCAAATAAATAGTGAAATTTGATCAAATTTTAAAAATTTAATTTTTATATTTAATATAGTAGAAATAAAATTAATTGCTCCTAAAATAGATGAAATTCCTGCAATATGTAAAGAAAAAATTGAAAAATCAACTGATGTTCCAGTATGTGCAATAATTGAAGAAAGAGGGGGGTAAACAGTTCATCCAGTTCCAGTTCCTGTTTCTACTATTCTTCTAATTAAAAGAAGTGTAAT…
Contarinianasturtii_colony_2	AGGATGTCCAAAAAATCAAAATAAATGTTGATAAAGAATTGGATCTCCTCCTCCTATTGGATCAAAGAATGAAGTATTTAAATTTCGATCAGTTAATAATATAGTAATTGCTCCTGCTAAAACAGGTAGTGATAATAAAAGAAGAATAGTAGTAATTAAAATAGATCAAATAAATAGTGAAATTTGATCAAATTTTAAAAATTTAATTTTTATATTTAATATAGTAGAAATAAAATTAATTGCTCCTAAAATAGATGAAATTCCTGCAATATGTAAAGAAAAAATTGAAAAATCAACTGATGTTCCAGTATGTGCAATAATTGAAGAAAGAGGGGGGTAAACAGTTCATCCAGTTCCAGTTCCTGTTTCTACTATTCTTCTAATTAAAAGAAGTGTAAT…
Contarinianasturtii_colony_3	AGGATGTCCAAAAAATCAAAATAAATGTTGATAAAGAATTGGATCTCCTCCTCCTATTGGATCAAAGAATGAAGTATTTAAATTTCGATCAGTTAATAATATAGTAATTGCTCCTGCTAAAACAGGTAGTGATAATAAAAGAAGAATAGTAGTAATTAAAATAGATCAAATAAATAGTGAAATTTGATCAAATTTTAAAAATTTAATTTTTATATTTAATATAGTAGAAATAAAATTAATTGCTCCTAAAATAGATGAAATTCCTGCAATATGTAAAGAAAAAATTGAAAAATCAACTGATGTTCCAGTATGTGCAATAATTGAAGAAAGAGGGGGGTAAACAGTTCATCCAGTTCCAGTTCCTGTTTCTACTATTCTTCTAATTAAAAGAAGTGTAAT…
Contarinianasturtii_colony_4	AGGATGTCCAAAAAATCAAAATAAATGTTGATAAAGAATTGGATCTCCTCCTCCTATTGGATCAAAGAATGAAGTATTTAAATTTCGATCAGTTAATAATATAGTAATTGCTCCTGCTAAAACAGGTAGTGATAATAAAAGAAGAATAGTAGTAATTAAAATAGATCAAATAAATAGTGAAATTTGATCAAATTTTAAAAATTTAATTTTTATATTTAATATAGTAGAAATAAAATTAATTGCTCCTAAAATAGATGAAATTCCTGCAATATGTAAAGAAAAAATTGAAAAATCAACTGATGTTCCAGTATGTGCAATAATTGAAGAAAGAGGGGGGTAAACAGTTCATCCAGTTCCAGTTCCTGTTTCTACTATTCTTCTAATTAAAAGAAGTGTAAT…
Contarinianasturtii_colony_5	AGGATGTCCAAAAAATCAAAATAAATGTTGATAAAGAATTGGATCTCCTCCTCCTATTGGATCAAAGAATGAAGTATTTAAATTTCGATCAGTTAATAATATAGTAATTGCTCCTGCTAAAACAGGTAGTGATAATAAAAGAAGAATAGTAGTAATTAAAATAGATCAAATAAATAGTGAAATTTGATCAAATTTTAAAAATTTAATTTTTATATTTAATATAGTAGAAATAAAATTAATTGCTCCTAAAATAGATGAAATTCCTGCAATATGTAAAGAAAAAATTGAAAAATCAACTGATGTTCCAGTATGTGCAATAATTGAAGAAAGAGGGGGGTAAACAGTTCATCCAGTTCCAGTTCCTGTTTCTACTATTCTTCTAATTAAAAGAAGTGTAAT…
Contarinianasturtii_colony_6	AGGATGTCCAAAAAATCAAAATAAATGTTGATAAAGAATTGGATCTCCTCCTCCTATTGGATCAAAGAATGAAGTATTTAAATTTCGATCAGTTAATAATATAGTAATTGCTCCTGCTAAAACAGGTAGTGATAATAAAAGAAGAATAGTAGTAATTAAAATAGATCAAATAAATAGTGAAATTTGATCAAATTTTAAAAATTTAATTTTTATATTTAATATAGTAGAAATAAAATTAATTGCTCCTAAAATAGATGAAATTCCTGCAATATGTAAAGAAAAAATTGAAAAATCAACTGATGTTCCAGTATGTGCAATAATTGAAGAAAGAGGGGGGTAAACAGTTCATCCAGTTCCAGTTCCTGTTTCTACTATTCTTCTAATTAAAAGAAGTGTAAT…
CarrotRiverSK2016_1	TGGGTGTCCAAAAAATCAAAATAGATGCTGATAAAGAACTGGATCTCCTCCTCCTATAGGATCAAAAAATGAAGTATTTAAATTTCGATCTGTTAATAGTATAGTAATTGCTCCTGCTAATACTGGTAGTGATAAAAGAAGAAGAATAGTAGTAATAAAAATTGATCAGATAAAAAGAGAAATTTGATCAAATTTTAAAAATTTAATTTTTATATTTAATATTGTAGAAATAAAATTAATAGCTCCTAAAATTGATGAAATTCCTGCTATATGTAAAGAAAAAATAGAAAAATCTACTGATGTTCCAGTATGAGCAATAATTGAAGAAAGAGGGGGATATACAGTTCAACCTGTTCCTGTTCCTGTTTCTACTATTCTTCTAATTAATAATAAAGAAAT…
CarrotRiverSK2016_2	TGGGTGTCCAAAAAATCAAAATAGATGCTGATAAAGAACTGGATCTCCTCCTCCTATAGGATCAAAAAATGAAGTATTTAAATTTCGATCTGTTAATAGTATAGTAATTGCTCCTGCTAATACTGGTAGTGATAAAAGAAGAAGAATAGTAGTAATAAAAATTGATCAGATAAAAAGAGAAATTTGATCAAATTTTAAAAATTTAATTTTTATATTTAATATTGTAGAAATAAAATTAATAGCTCCTAAAATTGATGAAATTCCTGCTATATGTAAAGAAAAAATAGAAAAATCTACTGATGTTCCAGTATGAGCAATAATTGAAGAAAGAGGGGGATATACAGTTCAACCTGTTCCTGTTCCTGTTTCTACTATTCTTCTAATTAATAATAAAGAAAT…
CarrotRiverSK2016_3	TGGGTGTCCAAAAAATCAAAATAGATGCTGATAAAGAACTGGATCTCCTCCTCCTATAGGATCAAAAAATGAAGTATTTAAATTTCGATCTGTTAATAGTATAGTAATTGCTCCTGCTAATACTGGTAGTGATAAAAGAAGAAGAATAGTAGTAATAAAAATTGATCAGATAAAAAGAGAAATTTGATCAAATTTTAAAAATTTAATTTTTATATTTAATATTGTAGAAATAAAATTAATAGCTCCTAAAATTGATGAAATTCCTGCTATATGTAAAGAAAAAATAGAAAAATCTACTGATGTTCCAGTATGAGCAATAATTGAAGAAAGAGGGGGATATACAGTTCAACCTGTTCCTGTTCCTGTTTCTACTATTCTTCTAATTAATAATAAAGAAAT…
CarrotRiverSK2016_4	TGGGTGTCCAAAAAATCAAAATAGATGCTGATAAAGAACTGGATCTCCTCCTCCTATAGGATCAAAAAATGAAGTATTTAAATTTCGATCTGTTAATAGTATAGTAATTGCTCCTGCTAATACTGGTAGTGATAAAAGAAGAAGAATAGTAGTAATAAAAATTGATCAGATAAAAAGAGAAATTTGATCAAATTTTAAAAATTTAATTTTTATATTTAATATTGTAGAAATAAAATTAATAGCTCCTAAAATTGATGAAATTCCTGCTATATGTAAAGAAAAAATAGAAAAATCTACTGATGTTCCAGTATGAGCAATAATTGAAGAAAGAGGGGGATATACAGTTCAACCTGTTCCTGTTCCTGTTTCTACTATTCTTCTAATTAATAATAAAGAAAT…
CarrotRiverSK2016_5	TGGGTGTCCAAAAAATCAAAATAGATGCTGATAAAGAACTGGATCTCCTCCTCCTATAGGATCAAAAAATGAAGTATTTAAATTTCGATCTGTTAATAGTATAGTAATTGCTCCTGCTAATACTGGTAGTGATAAAAGAAGAAGAATAGTAGTAATAAAAATTGATCAGATAAAAAGAGAAATTTGATCAAATTTTAAAAATTTAATTTTTATATTTAATATTGTAGAAATAAAATTAATAGCTCCTAAAATTGATGAAATTCCTGCTATATGTAAAGAAAAAATAGAAAAATCTACTGATGTTCCAGTATGAGCAATAATTGAAGAAAGAGGGGGATATACAGTTCAACCTGTTCCTGTTCCTGTTTCTACTATTCTTCTAATTAATAATAAAGAAAT…
CarrotRiverSK2013_1	TGGGTGTCCAAAAAATCAAAATAGATGCTGATAAAGAACTGGATCTCCTCCTCCTATAGGATCAAAAAATGAAGTATTTAAATTTCGATCTGTTAATAGTATAGTAATTGCTCCTGCTAATACTGGTAGTGATAAAAGAAGAAGAATAGTAGTAATAAAAATTGATCAGATAAAAAGAGAAATTTGATCAAATTTTAAAAATTTAATTTTTATATTTAATATTGTAGAAATAAAATTAATAGCTCCTAAAATTGATGAAATTCCTGCTATATGTAAAGAAAAAATAGAAAAATCTACTGATGTTCCAGTATGAGCAATAATTGAAGAAAGAGGGGGATATACAGTTCAACCTGTTCCTGTTCCTGTTTCTACTATTCTTCTAATTAATAATAAAGAAAT…
CarrotRiverSK2013_2	TGGGTGTCCAAAAAATCAAAATAGATGCTGATAAAGAACTGGATCTCCTCCTCCTATAGGATCAAAAAATGAAGTATTTAAATTTCGATCTGTTAATAGTATAGTAATTGCTCCTGCTAATACTGGTAGTGATAAAAGAAGAAGAATAGTAGTAATAAAAATTGATCAGATAAAAAGAGAAATTTGATCAAATTTTAAAAATTTAATTTTTATATTTAATATTGTAGAAATAAAATTAATAGCTCCTAAAATTGATGAAATTCCTGCTATATGTAAAGAAAAAATAGAAAAATCTACTGATGTTCCAGTATGAGCAATAATTGAAGAAAGAGGGGGATATACAGTTCAACCTGTTCCTGTTCCTGTTTCTACTATTCTTCTAATTAATAATAAAGAAAT…
CarrotRiverSK2013_3	TGGGTGTCCAAAAAATCAAAATAGATGCTGATAAAGAACTGGATCTCCTCCTCCTATAGGATCAAAAAATGAAGTATTTAAATTTCGATCTGTTAATAGTATAGTAATTGCTCCTGCTAATACTGGTAGTGATAAAAGAAGAAGAATAGTAGTAATAAAAATTGATCAGATAAAAAGAGAAATTTGATCAAATTTTAAAAATTTAATTTTTATATTTAATATTGTAGAAATAAAATTAATAGCTCCTAAAATTGATGAAATTCCTGCTATATGTAAAGAAAAAATAGAAAAATCTACTGATGTTCCAGTATGAGCAATAATTGAAGAAAGAGGGGGATATACAGTTCAACCTGTTCCTGTTCCTGTTTCTACTATTCTTCTAATTAATAATAAAGAAAT…
SmokyBurnSK2013	TGGGTGTCCAAAAAATCAAAATAGATGCTGATAAAGAACTGGATCTCCTCCTCCTATAGGATCAAAAAATGAAGTATTTAAATTTCGATCTGTTAATAGTATAGTAATTGCTCCTGCTAATACTGGTAGTGATAAAAGAAGAAGAATAGTAGTAATAAAAATTGATCAGATAAAAAGAGAAATTTGATCAAATTTTAAAAATTTAATTTTTATATTTAATATTGTAGAAATAAAATTAATAGCTCCTAAAATTGATGAAATTCCTGCTATATGTAAAGAAAAAATAGAAAAATCTACTGATGTTCCAGTATGAGCAATAATTGAAGAAAGAGGGGGATATACAGTTCAACCTGTTCCTGTTCCTGTTTCTACTATTCTTCTAATTAATAATAAAGAAAT…
CodetteSK_1	TGGGTGTCCAAAAAATCAAAATAGATGCTGATAAAGAACTGGATCTCCTCCTCCTATAGGATCAAAAAATGAAGTATTTAAATTTCGATCTGTTAATAGTATAGTAATTGCTCCTGCTAATACTGGTAGTGATAAAAGAAGAAGAATAGTAGTAATAAAAATTGATCAGATAAAAAGAGAAATTTGATCAAATTTTAAAAATTTAATTTTTATATTTAATATTGTAGAAATAAAATTAATAGCTCCTAAAATTGATGAAATTCCTGCTATATGTAAAGAAAAAATAGAAAAATCTACTGATGTTCCAGTATGAGCAATAATTGAAGAAAGAGGGGGATATACAGTTCAACCTGTTCCTGTTCCTGTTTCTACTATTCTTCTAATTAATAATAAAGAAAT…
CodetteSK_2	TGGGTGTCCAAAAAATCAAAATAGATGCTGATAAAGAACTGGATCTCCTCCTCCTATAGGATCAAAAAATGAAGTATTTAAATTTCGATCTGTTAATAGTATAGTAATTGCTCCTGCTAATACTGGTAGTGATAAAAGAAGAAGAATAGTAGTAATAAAAATTGATCAGATAAAAAGAGAAATTTGATCAAATTTTAAAAATTTAATTTTTATATTTAATATTGTAGAAATAAAATTAATAGCTCCTAAAATTGATGAAATTCCTGCTATATGTAAAGAAAAAATAGAAAAATCTACTGATGTTCCAGTATGAGCAATAATTGAAGAAAGAGGGGGATATACAGTTCAACCTGTTCCTGTTCCTGTTTCTACTATTCTTCTAATTAATAATAAAGAAAT…
CodetteSK_3	TGGGTGTCCAAAAAATCAAAATAGATGCTGATAAAGAACTGGATCTCCTCCTCCTATAGGATCAAAAAATGAAGTATTTAAATTTCGATCTGTTAATAGTATAGTAATTGCTCCTGCTAATACTGGTAGTGATAAAAGAAGAAGAATAGTAGTAATAAAAATTGATCAGATAAAAAGAGAAATTTGATCAAATTTTAAAAATTTAATTTTTATATTTAATATTGTAGAAATAAAATTAATAGCTCCTAAAATTGATGAAATTCCTGCTATATGTAAAGAAAAAATAGAAAAATCTACTGATGTTCCAGTATGAGCAATAATTGAAGAAAGAGGGGGATATACAGTTCAACCTGTTCCTGTTCCTGTTTCTACTATTCTTCTAATTAATAATAAAGAAAT…
CodetteSK_4	TGGGTGTCCAAAAAATCAAAATAGATGCTGATAAAGAACTGGATCTCCTCCTCCTATAGGATCAAAAAATGAAGTATTTAAATTTCGATCTGTTAATAGTATAGTAATTGCTCCTGCTAATACTGGTAGTGATAAAAGAAGAAGAATAGTAGTAATAAAAATTGATCAGATAAAAAGAGAAATTTGATCAAATTTTAAAAATTTAATTTTTATATTTAATATTGTAGAAATAAAATTAATAGCTCCTAAAATTGATGAAATTCCTGCTATATGTAAAGAAAAAATAGAAAAATCTACTGATGTTCCAGTATGAGCAATAATTGAAGAAAGAGGGGGATATACAGTTCAACCTGTTCCTGTTCCTGTTTCTACTATTCTTCTAATTAATAATAAAGAAAT…
CodetteSK_5	TGGGTGTCCAAAAAATCAAAATAGATGCTGATAAAGAACTGGATCTCCTCCTCCTATAGGATCAAAAAATGAAGTATTTAAATTTCGATCTGTTAATAGTATAGTAATTGCTCCTGCTAATACTGGTAGTGATAAAAGAAGAAGAATAGTAGTAATAAAAATTGATCAGATAAAAAGAGAAATTTGATCAAATTTTAAAAATTTAATTTTTATATTTAATATTGTAGAAATAAAATTAATAGCTCCTAAAATTGATGAAATTCCTGCTATATGTAAAGAAAAAATAGAAAAATCTACTGATGTTCCAGTATGAGCAATAATTGAAGAAAGAGGGGGATATACAGTTCAACCTGTTCCTGTTCCTGTTTCTACTATTCTTCTAATTAATAATAAAGAAAT…
CodetteSK_6	TGGGTGTCCAAAAAATCAAAATAGATGCTGATAAAGAACTGGATCTCCTCCTCCTATAGGATCAAAAAATGAAGTATTTAAATTTCGATCTGTTAATAGTATAGTAATTGCTCCTGCTAATACTGGTAGTGATAAAAGAAGAAGAATAGTAGTAATAAAAATTGATCAGATAAAAAGAGAAATTTGATCAAATTTTAAAAATTTAATTTTTATATTTAATATTGTAGAAATAAAATTAATAGCTCCTAAAATTGATGAAATTCCTGCTATATGTAAAGAAAAAATAGAAAAATCTACTGATGTTCCAGTATGAGCAATAATCGAAGAAAGAGGGGGATATACAGTTCAACCTGTTCCTGTTCCTGTTTCTACTATTCTTCTAATTAATAATAAAGAAAT…
CodetteSK_7	TGGGTGTCCAAAAAATCAAAATAGATGCTGATAAAGAACTGGATCTCCTCCTCCTATAGGATCAAAAAATGAAGTATTTAAATTTCGATCTGTTAATAGTATAGTAATTGCTCCTGCTAATACTGGTAGTGATAAAAGAAGAAGAATAGTAGTAATAAAAATTGATCAGATAAAAAGAGAAATTTGATCAAATTTTAAAAATTTAATTTTTATATTTAATATTGTAGAAATAAAATTAATAGCTCCTAAAATTGATGAAATTCCTGCTATATGTAAAGAAAAAATAGAAAAATCTACTGATGTTCCAGTATGAGCAATAATTGAAGAAAGAGGGGGATATACAGTTCAACCTGTTCCTGTTCCTGTTTCTACTATTCTTCTAATTAATAATAAAGAAAT…
ConsortAB_1	TGGGTGTCCAAAAAATCAAAATAGATGCTGATAAAGAACTGGATCTCCTCCTCCTATAGGATCAAAAAATGAAGTATTTAAATTTCGATCTGTTAATAGTATAGTAATTGCTCCTGCTAATACTGGTAGTGATAAAAGAAGAAGAATAGTAGTAATAAAAATTGATCAGATAAAAAGAGAAATTTGATCAAATTTTAAAAATTTAATTTTTATATTTAATATTGTAGAAATAAAATTAATAGCTCCTAAAATTGATGAAATTCCTGCTATATGTAAAGAAAAAATAGAAAAATCTACTGATGTTCCAGTATGAGCAATAATTGAAGAAAGAGGGGGATATACAGTTCAACCTGTTCCTGTTCCTGTTTCTACTATTCTTCTAATTAATAATAAAGAAAT…
ConsortAB_3	TGGGTGTCCAAAAAATCAAAATAGATGCTGATAAAGAACTGGATCTCCTCCTCCTATAGGATCAAAAAATGAAGTATTTAAATTTCGATCTGTTAATAGTATAGTAATTGCTCCTGCTAATACTGGTAGTGATAAAAGAAGAAGAATAGTAGTAATAAAAATTGATCAGATAAAAAGAGAAATTTGATCAAATTTTAAAAATTTAATTTTTATATTTAATATTGTAGAAATAAAATTAATAGCTCCTAAAATTGATGAAATTCCTGCTATATGTAAAGAAAAAATAGAAAAATCTACTGATGTTCCAGTATGAGCAATAATTGAAGAAAGAGGGGGATATACAGTTCAACCTGTTCCTGTTCCTGTTTCTACTATTCTTCTAATTAATAATAAAGAAAT…
ConsortAB_2	TGGGTGTCCAAAAAATCAAAATAGATGCTGATAAAGAACTGGATCTCCTCCTCCTATAGGATCAAAAAATGAAGTATTTAAATTTCGATCTGTTAATAGTATAGTAATTGCTCCTGCTAATACTGGTAGTGATAAAAGAAGAAGAATAGTAGTAATAAAAATTGATCAGATAAAAAGAGAAATTTGATCAAATTTTAAAAATTTAATTTTTATATTTAATATTGTAGAAATAAAATTAATAGCTCCTAAAATTGATGAAATTCCTGCTATATGTAAAGAAAAAATAGAAAAATCTACTGATGTTCCAGTATGAGCAATAATTGAAGAAAGAGGGGGATATACAGTTCAACCTGTTCCTGTTCCTGTTTCTACTATTCTTCTAATTAATAATAAAGAAAT…
EU812560_Contarinia_nasturtii	AGGATGTCCAAAAAATCAAAATAAATGTTGATAAAGAATTGGATCTCCTCCTCCTATTGGATCAAAGAATGAAGTATTTAAATTTCGATCAGTTAATAATATAGTAATTGCTCCTGCTAAAACAGGTAGTGATAATAAAAGAAGAATAGTAGTAATTAAAATAGATCAAATAAATAGTGAAATTTGATCAAATTTTAAAAATTTAATTTTTATATTTAATATAGTAGAAATAAAATTAATTGCTCCTAAAATAGATGAAATTCCTGCAATATGTAAAGAAAAAATTGAAAAATCAACTGATGTTCCAGTATGTGCAATAATTGAAGAAAGAGGGGGGTAAACAGTTCATCCAGTTCCAGTTCCTGTTTCTACTATTCTTCTAATTAAAAGAAGTGTAAT…
HairyHillAB_1	TGGGTGTCCAAAAAATCAAAATAGATGCTGATAAAGAACTGGATCTCCTCCTCCTATAGGATCAAAAAATGAAGTATTTAAATTTCGATCTGTTAATAGTATAGTAATTGCTCCTGCTAATACTGGTAGTGATAAAAGAAGAAGAATAGTAGTAATAAAAATTGATCAGATAAAAAGAGAAATTTGATCAAATTTTAAAAATTTAATTTTTATATTTAATATTGTAGAAATAAAATTAATAGCTCCTAAAATTGATGAAATTCCTGCTATATGTAAAGAAAAAATAGAAAAATCTACTGATGTTCCAGTATGAGCAATAATTGAAGAAAGAGGGGGATATACAGTTCAACCTGTTCCTGTTCCTGTTTCTACTATTCTTCTAATTAATAATAAAGAAAT…
HairyHillAB_2	TGGGTGTCCAAAAAATCAAAATAGATGCTGATAAAGAACTGGATCTCCTCCTCCTATAGGATCAAAAAATGAAGTATTTAAATTTCGATCTGTTAATAGTATAGTAATTGCTCCTGCTAATACTGGTAGTGATAAAAGAAGAAGAATAGTAGTAATAAAAATTGATCAGATAAAAAGAGAAATTTGATCAAATTTTAAAAATTTAATTTTTATATTTAATATTGTAGAAATAAAATTAATAGCTCCTAAAATTGATGAAATTCCTGCTATATGTAAAGAAAAAATAGAAAAATCTACTGATGTTCCAGTATGAGCAATAATTGAAGAAAGAGGGGGATATACAGTTCAACCTGTTCCTGTTCCTGTTTCTACTATTCTTCTAATTAATAATAAAGAAAT…
HairyHillAB_3	TGGGTGTCCAAAAAATCAAAATAGATGCTGATAAAGAACTGGATCTCCTCCTCCTATAGGATCAAAAAATGAAGTATTTAAATTTCGATCTGTTAATAGTATAGTAATTGCTCCTGCTAATACTGGTAGTGATAAAAGAAGAAGAATAGTAGTAATAAAAATTGATCAGATAAAAAGAGAAATTTGATCAAATTTTAAAAATTTAATTTTTATATTTAATATTGTAGAAATAAAATTAATAGCTCCTAAAATTGATGAAATTCCTGCTATATGTAAAGAAAAAATAGAAAAATCTACTGATGTTCCAGTATGAGCAATAATTGAAGAAAGAGGGGGATATACAGTTCAACCTGTTCCTGTTCCTGTTTCTACTATTCTTCTAATTAATAATAAAGAAAT…
HardistyAB	TGGGTGTCCAAAAAATCAAAATAGATGCTGATAAAGAACTGGATCTCCTCCTCCTATAGGATCAAAAAATGAAGTATTTAAATTTCGATCTGTTAATAGTATAGTAATTGCTCCTGCTAATACTGGTAGTGATAAAAGAAGAAGAATAGTAGTAATAAAAATTGATCAGATAAAAAGAGAAATTTGATCAAATTTTAAAAATTTAATTTTTATATTTAATATTGTAGAAATAAAATTAATAGCTCCTAAAATTGATGAAATTCCTGCTATATGTAAAGAAAAAATAGAAAAATCTACTGATGTTCCAGTATGAGCAATAATTGAAGAAAGAGGGGGATATACAGTTCAACCTGTTCCTGTTCCTGTTTCTACTATTCTTCTAATTAATAATAAAGAAAT…
IrmaAB_1	TGGGTGTCCAAAAAATCAAAATAGATGTTGATAAAGAACTGGATCTCCTCCTCCTATAGGATCAAAAAATGAAGTATTTAAATTTCGATCTGTTAATAATATAGTAATTGCTCCTGCTAATACTGGTAGAGATAAAAGAAGAAGAATAGTAGTAATAAAAATTGATCAGATAAAAAGAGAAATTTGATCAAATTTTAAAAATTTAATTTTTATATTTAATATTGTAGAGATAAAATTAATAGCTCCTAAAATTGATGAAATTCCTGCTATATGTAAAGAAAAAATAGAAAAATCTACTGATGTTCCAGTATGGGCAATAATTGAAGAAAGAGGGGGGTATACAGTTCAACCTGTTCCTGTTCCTGTTTCTACTATTCTTCTAATTAATAATAAAGAAAT…
IrmaAB_2	TGGGTGTCCAAAAAATCAAAATAGATGTTGATAAAGAACTGGATCTCCTCCTCCTATAGGATCAAAAAATGAAGTATTTAAATTTCGATCTGTTAATAATATAGTAATTGCTCCTGCTAATACTGGTAGAGATAAAAGAAGAAGAATAGTAGTAATAAAAATTGATCAGATAAAAAGAGAAATTTGATCAAATTTTAAAAATTTAATTTTTATATTTAATATTGTAGAGATAAAATTAATAGCTCCTAAAATTGATGAAATTCCTGCTATATGTAAAGAAAAAATAGAAAAATCTACTGATGTTCCAGTATGGGCAATAATTGAAGAAAGAGGGGGGTATACAGTTCAACCTGTTCCTGTTCCTGTTTCTACTATTCTTCTAATTAATAATAAAGAAAT…
IrmaAB_3	TGGGTGTCCAAAAAATCAAAATAGATGCTGATAAAGAACTGGATCTCCTCCTCCTATAGGATCAAAAAATGAAGTATTTAAATTTCGATCTGTTAATAGTATAGTAATTGCTCCTGCTAATACTGGTAGTGATAAAAGAAGAAGAATAGTAGTAATAAAAATTGATCAGATAAAAAGAGAAATTTGATCAAATTTTAAAAATTTAATTTTTATATTTAATATTGTAGAAATAAAATTAATAGCTCCTAAAATTGATGAAATTCCTGCTATATGTAAAGAAAAAATAGAAAAATCTACTGATGTTCCAGTATGAGCAATAATTGAAGAAAGAGGGGGATATACAGTTCAACCTGTTCCTGTTCCTGTTTCTACTATTCTTCTAATTAATAATAAAGAAAT…
JQ684875_Contarinia_fagi	TGGGTGTCCAAAAAATCAAAATAAATGTTGATAAAGAACTGGATCTCCCCCTCCTATAGGGTCAAAAAATGAAGTATTTAAATTACGATCTGTTAATAGCATTGTAATAGCTCCTGCCAGAACAGGTAGTGATAAAAGTAATAAAATAGTTGTAATTAAAATTGATCAAATAAATAATGAAATTTGATCAAATTTTAAGAATTTAATTTTTATATTTAATATTGTAGAAATAAAATTAATTGCTCCTAAAATAGAAGAAATCCCTGCGATGTGAAGTGAGAAAATTGAAAAATCTACTGAAGAACCAGTATGTGCAATAATAGATGAAAGGGGTGGGTAAACTGTTCATCCTGTACCAGTACCTGTTTCAATCATTCTTCTAATTAATAATAATGATAA…
JQ684876_Contarinia_fagi	AGGATGTCCAAAAAATCAAAATAAGTGTTGATATAAAATGGGGTCTCCTCCTCCTATAGGATCAAAAAATGATGTATTTAAGTTTCGATCTGTTAATAATATAGTAATTGCTCCAGCTAATACAGGTAAAGATAAAAGTAATAATACTGCAGTAATTAATACTGATCATGTAAATAAAGAAATTTGATCAAAATTTAAAAATTTAATTTTTATATTTAATATAGTTGAAATAAAATTAATTGCTCCTAAAATAGAAGAAATACCCGCAATATGTAAAGAAAAAATTGAAAAATCTACAGAAGATCCTGTATGTGCAATAACAGATGATAGTGGAGGATAAACAGTTCATCCTGTACCTGTTCCTGTTTCTACTATTCTCCTAATTAATAATAAAGATAA…
KinsellaAB_1	TGGGTGTCCAAAAAATCAAAATAGATGCTGATAAAGAACTGGATCTCCTCCTCCTATAGGATCAAAAAATGAAGTATTTAAATTTCGATCTGTTAATAGTATAGTAATTGCTCCTGCTAATACTGGTAGTGATAAAAGAAGAAGAATAGTAGTAATAAAAATTGATCAGATAAAAAGAGAAATTTGATCAAATTTTAAAAATTTAATTTTTATATTTAATATTGTAGAAATAAAATTAATAGCTCCTAAAATTGATGAAATTCCTGCTATATGTAAAGAAAAAATAGAAAAATCTACTGATGTTCCAGTATGAGCAATAATTGAAGAAAGAGGGGGATATACAGTTCAACCTGTTCCTGTTCCTGTTTCTACTATTCTTCTAATTAATAATAAAGAAAT…
KinsellaAB_2	TGGGTGTCCAAAAAATCAAAATAGATGCTGATAAAGAACTGGATCTCCTCCTCCTATAGGATCAAAAAATGAAGTATTTAAATTTCGATCTGTTAATAGTATAGTAATTGCTCCTGCTAATACTGGTAGTGATAAAAGAAGAAGAATAGTAGTAATAAAAATTGATCAGATAAAAAGAGAAATTTGATCAAATTTTAAAAATTTAATTTTTATATTTAATATTGTAGAAATAAAATTAATAGCTCCTAAAATTGATGAAATTCCTGCTATATGTAAAGAAAAAATAGAAAAATCTACTGATGTTCCAGTATGAGCAATAATTGAAGAAAGAGGGGGATATACAGTTCAACCTGTTCCTGTTCCTGTTTCTACTATTCTTCTAATTAATAATAAAGAAAT…
KR656115_Contarinia_nasturtii	------------------------------------------------------------------------------------TCGATCAGTTAATAATATAGTAATTGCTCCTGCTAAAACAGGTAGTGATAATAAAAGAAGAATAGTAGTAATTAAAATAGATCAAATAAATAGTGAAATTTGATCAAATTTTAAAAATTTAATTTTTATATTTAATATAGTAGAAATAAAATTAATTGCTCCTAAAATAGA
KY200675_Contarinia_quinquenotata	------------------AAATAAATGTTGATAAAGAATTGGATCTCCTCCTCCTATAGGATCAAAAAAAGATGTATTAAAATTTCGGTCAGTTAATAATATTGTAATTGCTCCAGCTAAAACTGGTAAAGAAAGTAATAAAAGAATTGTTGTAATTAAAATTGATCAAATAAATAATGAAATTTGACTAAATTTTAAAAATTTAATTTTTATATTTAACATTGTTGAAATAAAATTAATTGCTCCTAAAATTGA
LavoyAB	TGGGTGTCCAAAAAATCAAAATAGATGTTGATAAAGAACTGGATCACCTCCTCCTATAGGGTCAAAAAATGAAGTATTTAAATTTCGATCTGTTAATAGTATAGTAATTGCTCCTGCTAATACTGGTAGTGATAATAGAAGAAGAATAGTAGTAATAAAAATTGATCAGATAAAAAGAGAAATTTGATCAAATTTTAAAAATTTAATTTTTATATTTAATATTGTAGAAATAAAATTAATAGCTCCTAAAATTGATGAAATTCCTGCTATATGTAAAGAAAAAATAGAGAAATCTACTGATGTTCCAGTATGAGCAATAATTGAAGAAAGAGGGGGATATACAGTTCAACCTGTTCCTGTTCCTGTTTCTACTATTCTTCTAATTAATAATAAAGAAAT…
MannvilleAB_1	TGGGTGTCCAAAAAATCAAAATAGATGCTGATAAAGAACTGGATCTCCTCCTCCTATAGGATCAAAAAATGAAGTATTTAAATTTCGATCTGTTAATAGTATAGTAATTGCTCCTGCTAATACTGGTAGTGATAAAAGAAGAAGAATAGTAGTAATAAAAATTGATCAGATAAAAAGAGAAATTTGATCAAATTTTAAAAATTTAATTTTTATATTTAATATTGTAGAAATAAAATTAATAGCTCCTAAAATTGATGAAATTCCTGCTATATGTAAAGAAAAAATAGAAAAATCTACTGATGTTCCAGTATGAGCAATAATTGAAGAAAGAGGGGGATATACAGTTCAACCTGTTCCTGTTCCTGTTTCTACTATTCTTCTAATTAATAATAAAGAAAT…
MannvilleAB_2	TGGGTGTCCAAAAAATCAAAATAGATGCTGATAAAGAACTGGATCTCCTCCTCCTATAGGATCAAAAAATGAAGTATTTAAATTTCGATCTGTTAATAGTATAGTAATTGCTCCTGCTAATACTGGTAGTGATAAAAGAAGAAGAATAGTAGTAATAAAAATTGATCAGATAAAAAGAGAAATTTGATCAAATTTTAAAAATTTAATTTTTATATTTAATATTGTAGAAATAAAATTAATAGCTCCTAAAATTGATGAAATTCCTGCTATATGTAAAGAAAAAATAGAAAAATCTACTGATGTTCCAGTATGAGCAATAATTGAAGAAAGAGGGGGATATACAGTTCAACCTGTTCCTGTTCCTGTTTCTACTATTCTTCTAATTAATAATAAAGAAAT…
MannvilleAB_3	TGGGTGTCCAAAAAATCAAAGTAGATGCTGATAAAGAACTGGATCTCCTCCTCCTATAGGATCAAAAAATGAAGTATTTAAATTTCGATCTGTTAATAGTATAGTAATTGCTCCTGCTAATACTGGTAGTGATAAAAGAAGAAGAATAGTAGTAATAAAAATTGATCAGATAAAAAGAGAAATTTGATCAAATTTTAAAAATTTAATTTTTATATTTAATATTGTAGAAATAAAATTAATAGCTCCTAAAATTGATGAAATTCCTGCTATATGTAAAGAAAAAATAGAAAAATCTACTGATGTTCCAGTATGAGCAATAATTGAAGAAAGAGGGGGATATACAGTTCAACCTGTTCCTGTTCCTGTTTCTACTATTCTTCTAATTAATAATAAAGAAAT…
MarwayneAB_1	TGGGTGTCCAAAAAATCAAAATAGATGATGATAAAGAACTGGATCTCCTCCTCCTATAGGATCAAAAAATGAAGTATTTAAATTTCGATCTGTTAATAGTATAGTAATTGCTCCTGCTAATACTGGTAGTGATAAAAGAAGAAGAATAGTAGTAATAAAAATTGATCAGATAAAAAGAGAAATTTGATCAAATTTTAAAAATTTAATTTTTATATTTAATATTGTAGAAATAAAATTAATAGCTCCTAAAATTGATGAAATTCCTGCTATATGTAAAGAAAAAATAGAAAAATCTACTGATGTTCCAGTATGAGCAATAATTGAAGAAAGAGGGGGATATACAGTTCAACCTGTTCCTGTTCCTGTTTCTACTATTCTTCTAATTAATAATAAAGAAAT…
MarwayneAB_2	TGGGTGTCCAAAAAATCAAAATAGATGTTGATAAAGAACTGGATCACCTCCTCCTATAGGGTCAAAAAATGAAGTATTTAAATTTCGATCTGTTAATAGTATAGTAATTGCTCCTGCTAATACTGGTAGTGATAATAGAAGAAGAATAGTAGTAATAAAAATTGATCAGATAAAAAGAGAAATTTGATCAAATTTTAAAAATTTAATTTTTATATTTAATATTGTAGAAATAAAATTAATAGCTCCTAAAATTGATGAAATTCCTGCTATATGTAAAGAAAAAATAGAGAAATCTACTGATGTTCCAGTATGAGCAATAATTGAAGAAAGAGGGGGATATACAGTTCAACCTGTTCCTGTTCCTGTTTCTACTATTCTTCTAATTAATAATAAAGAAAT…
MarwayneAB_3	TGGGTGTCCAAAAAATCAAAATAGATGTTGATAAAGAACTGGATCACCTCCTCCTATAGGGTCAAAAAATGAGGTATTTAAATTTCGATCTGTTAATAGTATAGTAATTGCTCCTGCTAATACTGGTAGTGATAATAGAAGAAGAATAGTAGTAATAAAAATTGATCAGATAAAAAGAGAAATTTGATCAAATTTTAAAAATTTAATTTTTATATTTAATATTGTAGAAATAAAATTAATAGCTCCTAAAATTGATGAAATTCCTGCTATATGTAAAGAAAAAATAGAGAAATCTACTGATGTTCCAGTATGAGCAATGATTGAAGAAAGAGGGGGATATACAGTTCAACCTGTTCCTGTTCCTGTTTCTACTATTCTTCTAATTAATAATAAAGAAAT…
MelfortSK_1	TGGGTGTCCAAAAAATCAAAATAGATGCTGATAAAGAACTGGATCTCCTCCTCCTATAGGATCAAAAAATGAAGTATTTAAATTTCGATCTGTTAATAGTATAGTAATTGCTCCTGCTAATACTGGTAGTGATAAAAGAAGAAGAATAGTAGTAATAAAAATTGATCAGATAAAAAGAGAAATTTGATCAAATTTTAAAAATTTAATTTTTATATTTAATATTGTAGAAATAAAATTAATAGCTCCTAAAATTGATGAAATTCCTGCTATATGTAAAGAAAAAATAGAAAAATCTACTGATGTTCCAGTATGAGCAATAATTGAAGAAAGAGGGGGATATACAGTTCAACCTGTTCCTGTTCCTGTTTCTACTATTCTTCTAATTAATAATAAAGAAAT…
MelfortSK_2	TGGGTGTCCAAAAAATCAAAATAGATGCTGATAAAGAACTGGATCTCCTCCTCCTATAGGATCAAAAAATGAAGTATTTAAATTTCGATCTGTTAATAGTATAGTAATTGCTCCTGCTAATACTGGTAGTGATAAAAGAAGAAGAATAGTAGTAATAAAAATTGATCAGATAAAAAGAGAAATTTGATCAAATTTTAAAAATTTAATTTTTATATTTAATATTGTAGAAATAAAATTAATAGCTCCTAAAATTGATGAAATTCCTGCTATATGTAAAGAAAAAATAGAAAAATCTACTGATGTTCCAGTATGAGCAATAATTGAAGAAAGAGGGGGATATACAGTTCAACCTGTTCCTGTTCCTGTTTCTACTATTCTTCTAATTAATAATAAAGAAAT…
MelfortSK_3	TGGGTGTCCAAAAAATCAAAATAGATGCTGATAAAGAACTGGATCTCCTCCTCCTATAGGATCAAAAAATGAAGTATTTAAATTTCGATCTGTTAATAGTATAGTAATTGCTCCTGCTAATACTGGTAGTGATAAAAGAAGAAGAATAGTAGTAATAAAAATTGATCAGATAAAAAGAGAAATTTGATCAAATTTTAAAAATTTAATTTTTATATTTAATATTGTAGAAATAAAATTAATAGCTCCTAAAATTGATGAAATTCCTGCTATATGTAAAGAAAAAATAGAAAAATCTACTGATGTTCCAGTATGAGCAATAATTGAAGAAAGAGGGGGATATACAGTTCAACCTGTTCCTGTTCCTGTTTCTACTATTCTTCTAATTAATAATAAAGAAAT…
MelfortSK_4	TGGGTGTCCAAAAAATCAAAATAGATGCTGATAAAGAACTGGATCTCCTCCTCCTATAGGATCAAAAAATGAAGTATTTAAATTTCGATCTGTTAATAGTATAGTAATTGCTCCTGCTAATACTGGTAGTGATAAAAGAAGAAGAATAGTAGTAATAAAAATTGATCAGATAAAAAGAGAAATTTGATCAAATTTTAAAAATTTAATTTTTATATTTAATATTGTAGAAATAAAATTAATAGCTCCTAAAATTGATGAAATTCCTGCTATATGTAAAGAAAAAATAGAAAAATCTACTGATGTTCCAGTATGAGCAATAATTGAAGAAAGAGGGGGATATACAGTTCAACCTGTTCCTGTTCCTGTTTCTACTATTCTTCTAATTAATAATAAAGAAAT…
MelfortSK_5	TGGGTGTCCAAAAAATCAAAATAGATGCTGATAAAGAACTGGATCTCCTCCTCCTATAGGATCAAAAAATGAAGTATTTAAATTTCGATCTGTTAATAGTATAGTAATTGCTCCTGCTAATACTGGTAGTGATAAAAGAAGAAGAATAGTAGTAATAAAAATTGATCAGATAAAAAGAGAAATTTGATCAAATTTTAAAAATTTAATTTTTATATTTAATATTGTAGAAATAAAATTAATAGCTCCTAAAATTGATGAAATTCCTGCTATATGTAAAGAAAAAATAGAAAAATCTACTGATGTTCCAGTATGAGCAATAATTGAAGAAAGAGGGGGATATACAGTTCAACCTGTTCCTGTTCCTGTTTCTACTATTCTTCTAATTAATAATAAAGAAAT…
MyrnamAB_1	TGGGTGTCCAAAAAATCAAAATAGATGCTGATAAAGAACTGGATCTCCTCCTCCTATAGGATCAAAAAATGAAGTATTTAAATTTCGATCTGTTAATAGTATAGTAATTGCTCCTGCTAATACTGGTAGTGATAAAAGAAGAAGAATAGTAGTAATAAAAATTGATCAGATAAAAAGAGAAATTTGATCAAATTTTAAAAATTTAATTTTTATATTTAATATTGTAGAAATAAAATTAATAGCTCCTAAAATTGATGAAATTCCTGCTATATGTAAAGAAAAAATAGAAAAATCTACTGATGTTCCAGTATGAGCAATAATTGAAGAAAGAGGGGGATATACAGTTCAACCTGTTCCTGTTCCTGTTTCTACTATTCTTCTAATTAATAATAAAGAAAT…
MyrnamAB_2	TGGGTGTCCAAAAAATCAAAATAGATGCTGATAAAGAACTGGATCTCCTCCTCCTATAGGATCAAAAAATGAAGTATTTAAATTTCGATCTGTTAATAGTATAGTAATTGCTCCTGCTAATACTGGTAGTGATAAAAGAAGAAGAATAGTAGTAATAAAAATTGATCAGATAAAAAGAGAAATTTGATCAAATTTTAAAAATTTAATTTTTATATTTAATATTGTAGAAATAAAATTAATAGCTCCTAAAATTGATGAAATTCCTGCTATATGTAAAGAAAAAATAGAAAAATCTACTGATGTTCCAGTATGAGCAATAATTGAAGAAAGAGGGGGATATACAGTTCAACCTGTTCCTGTTCCTGTTTCTACTATTCTTCTAATTAATAATAAAGAAAT…
MyrnamAB_3	TGGGTGTCCAAAAAATCAAGATAGATGCTGATAAAGAACTGGATCTCCTCCTCCTATAGGATCAAAAAATGAAGTATTTAAATTTCGATCTGTTAATAGTATAGTAATTGCTCCTGCTAATACTGGTAGTGATAAAAGAAGAAGAATAGTAGTAATAAAAATTGATCAGATAAAAAGAGAAATTTGATCAAATTTTAAAAATTTAATTTTTATATTTAATATTGTAGAAATAAAATTAATAGCTCCTAAAATTGATGAAATTCCTGCTATATGTAAAGAAAAAATAGAAAAATCTACTGATGTTCCAGTATGAGCAATAATTGAAGAAAGAGGGGGATATACAGTTCAACCTGTTCCTGTTCCTGTTTCTACTATTCTTCTAATTAATAATAAAGAAAT…
ProvostAB_2	TGGGTGTCCAAAAAATCAAAATAGATGCTGATAAAGAACTGGATCTCCTCCTCCTATAGGATCAAAAAATGAAGTATTTAAATTTCGATCTGTTAATAGTATAGTAATTGCTCCTGCTAATACTGGTAGTGATAAAAGAAGAAGAATAGTAGTAATAAAAATTGATCAGATAAAAAGAGAAATTTGATCAAATTTTAAAAATTTAATTTTTATATTTAATATTGTAGAAATAAAATTAATAGCTCCTAAAATTGATGAAATTCCTGCTATATGTAAAGAAAAAATAGAAAAATCTACTGATGTTCCAGTATGAGCAATAATTGAAGAAAGAGGGGGATATACAGTTCAACCTGTTCCTGTTCCTGTTTCTACTATTCTTCTAATTAATAATAAAGAAAT…
ProvostAB_3	TGGGTGTCCAAAAAATCAAAATAGATGCTGATAAAGAACTGGATCTCCTCCTCCTATAGGATCAAAAAATGAAGTATTTAAATTTCGATCTGTTAATAGTATAGTAATTGCTCCTGCTAATACTGGTAGTGATAAAAGAAGAAGAATAGTAGTAATAAAAATTGATCAGATAAAAAGAGAAATTTGATCAAATTTTAAAAATTTAATTTTTATATTTAATATTGTAGAAATAAAATTAATAGCTCCTAAAATTGATGAAATTCCTGCTATATGTAAAGAAAAAATAGAAAAATCTACTGATGTTCCAGTATGAGCAATAATTGAAGAAAGAGGGGGATATACAGTTCAACCTGTTCCTGTTCCTGTTTCTACTATTCTTCTAATTAATAATAAAGAAAT…
ProvostAB_1	TGGGTGTCCAAAAAATCAAAATAGATGCTGATAAAGAACTGGATCTCCTCCTCCTATAGGATCAAAAAATGAAGTATTTAAATTTCGATCTGTTAATAGTATAGTAATTGCTCCTGCTAATACTGGTAGTGATAAAAGAAGAAGAATAGTAGTAATAAAAATTGATCAGATAAAAAGAGAAATTTGATCAAATTTTAAAAATTTAATTTTTATATTTAATATTGTAGAAATAAAATTAATAGCTCCTAAAATTGATGAAATTCCTGCTATATGTAAAGAAAAAATAGAAAAATCTACTGATGTTCCAGTATGAGCAATAATTGAAGAAAGAGGGGGATATACAGTTCAACCTGTTCCTGTTCCTGTTTCTACTATTCTTCTAATTAATAATAAAGAAAT…
RidgedaleSK_1	TGGGTGTCCAAAAAATCAAAATAGATGCTGATAAAGAACTGGATCTCCTCCTCCTATAGGATCAAAAAATGAAGTATTTAAATTTCGATCTGTTAATAGTATAGTAATTGCTCCTGCTAATACTGGTAGTGATAAAAGAAGAAGAATAGTAGTAATAAAAATTGATCAGATAAAAAGAGAAATTTGATCAAATTTTAAAAATTTAATTTTTATATTTAATATTGTAGAAATAAAATTAATAGCTCCTAAAATTGATGAAATTCCTGCTATATGTAAAGAAAAAATAGAAAAATCTACTGATGTTCCAGTATGAGCAATAATTGAAGAAAGAGGGGGATATACAGTTCAACCTGTTCCTGTTCCTGTTTCTACTATTCTTCTAATTAATAATAAAGAAAT…
RidgedaleSK_2	TGGGTGTCCAAAAAATCAAAATAGATGCTGATAAAGAACTGGATCTCCTCCTCCTATAGGATCAAAAAATGAAGTATTTAAATTTCGATCTGTTAATAGTATAGTAATTGCTCCTGCTAATACTGGTAGTGATAAAAGAAGAAGAATAGTAGTAATAAAAATTGATCAGATAAAAAGAGAAATTTGATCAAATTTTAAAAATTTAATTTTTATATTTAATATTGTAGAAATAAAATTAATAGCTCCTAAAATTGATGAAATTCCTGCTATATGTAAAGAAAAAATAGAAAAATCTACTGATGTTCCAGTATGAGCAATAATTGAAGAAAGAGGGGGATATACAGTTCAACCTGTTCCTGTTCCTGTTTCTACTATTCTTCTAATTAATAATAAAGAAAT…
RidgedaleSK_3	TGGGTGTCCAAAAAATCAAAATAGATGCTGATAAAGAACTGGATCTCCTCCTCCTATAGGATCAAAAAATGAAGTATTTAAATTTCGATCTGTTAATAGTATAGTAATTGCTCCTGCTAATACTGGTAGTGATAAAAGAAGAAGAATAGTAGTAATAAAAATTGATCAGATAAAAAGAGAAATTTGATCAAATTTTAAAAATTTAATTTTTATATTTAATATTGTAGAAATAAAATTAATAGCTCCTAAAATTGATGAAATTCCTGCTATATGTAAAGAAAAAATAGAAAAATCTACTGATGTTCCAGTATGAGCAATAATTGAAGAAAGAGGGGGATATACAGTTCAACCTGTTCCTGTTCCTGTTTCTACTATTCTTCTAATTAATAATAAAGAAAT…
RidgedaleSK_4	TGGGTGTCCAAAAAATCAAAATAGATGCTGATAAAGAACTGGATCTCCTCCTCCTATAGGATCAAAAAATGAAGTATTTAAATTTCGATCTGTTAATAGTATAGTAATTGCTCCTGCTAATACTGGTAGTGATAAAAGAAGAAGAATAGTAGTAATAAAAATTGATCAGATAAAAAGAGAAATTTGATCAAATTTTAAAAATTTAATTTTTATATTTAATATTGTAGAAATAAAATTAATAGCTCCTAAAATTGATGAAATTCCTGCTATATGTAAAGAAAAAATAGAAAAATCTACTGATGTTCCAGTATGAGCAATAATTGAAGAAAGAGGGGGATATACAGTTCAACCTGTTCCTGTTCCTGTTTCTACTATTCTTCTAATTAATAATAAAGAAAT…
RidgedaleSK_5	TGGGTGTCCAAAAAATCAAAATAGATGCTGATAAAGAACTGGATCTCCTCCTCCTATAGGATCAAAAAATGAAGTATTTAAATTTCGATCTGTTAATAGTATAGTAATTGCTCCTGCTAATACTGGTAGTGATAAAAGAAGAAGAATAGTAGTAATAAAAATTGATCAGATAAAAAGAGAAATTTGATCAAATTTTAAAAATTTAATTTTTATATTTAATATTGTAGAAATAAAATTAATAGCTCCTAAAATTGATGAAATTCCTGCTATATGTAAAGAAAAAATAGAAAAATCTACTGATGTTCCAGTATGAGCAATAATTGAAGAAAGAGGGGGATATACAGTTCAACCTGTTCCTGTTCCTGTTTCTACTATTCTTCTAATTAATAATAAAGAAAT…
RidgedaleSK_6	TGGGTGTCCAAAAAATCAAAATAGATGTTGATAAAGAACTGGATCTCCTCCTCCTATAGGATCAAAAAATGAAGTATTTAAATTTCGATCTGTTAATAATATAGTAATTGCTCCTGCTAATACTGGTAGAGATAAAAGAAGAAGAATAGTAGTAATAAAAATTGATCAGATAAAAAGAGAAATTTGATCAAATTTTAAAAATTTAATTTTTATATTTAATATTGTAGAGATAAAATTAATAGCTCCTAAAATTGATGAAATTCCTGCTATATGTAAAGAAAAAATAGAAAAATCTACTGATGTTCCAGTATGGGCAATAATTGAAGAAAGAGGGGGGTATACAGTTCAACCTGTTCCTGTTCCTGTTTCTACTATTCTTCTAATTAATAATAAAGAAAT…
RidgedaleSK_7	TGGGTGTCCAAAAAATCAAAATAGATGCTGATAAAGAACTGGATCTCCTCCTCCTATAGGATCAAAAAATGAAGTATTTAAATTTCGATCTGTTAATAGTATAGTAATTGCTCCTGCTAATACTGGTAGTGATAAAAGAAGAAGAATAGTAGTAATAAAAATTGATCAGATAAAAAGAGAAATTTGATCAAATTTTAAAAATTTAATTTTTATATTTAATATTGTAGAAATAAAATTAATAGCTCCTAAAATTGATGAAATTCCTGCTATATGTAAAGAAAAAATAGAAAAATCTACTGATGTTCCAGTATGAGCAATAATTGAAGAAAGAGGGGGGTATACAGTTCAACCTGTTCCTGTTCCTGTTTCTACTATTCTTCTAATTAATAATAAAGAAAT…
RorosAB_1	TGGGTGTCCAAAAAATCAAAATAGATGCTGATAAAGAACTGGATCTCCTCCTCCTATAGGATCAAAAAATGAAGTATTTAAATTTCGATCTGTTAATAGTATAGTAATTGCTCCTGCTAATACTGGTAGTGATAAAAGAAGAAGAATAGTAGTAATAAAAATTGATCAGATAAAAAGAGAAATTTGATCAAATTTTAAAAATTTAATTTTTATATTTAATATTGTAGAAATAAAATTAATAGCTCCTAAAATTGATGAAATTCCTGCTATATGTAAAGAAAAAATAGAAAAATCTACTGATGTTCCAGTATGAGCAATAATTGAAGAAAGAGGGGGATATACAGTTCAACCTGTTCCTGTTCCTGTTTCTACTATTCTTCTAATTAATAATAAAGAAAT…
RorosAB_2	TGGGTGTCCAAAAAATCAAAATAGATGCTGATAAAGAACTGGATCTCCTCCTCCTATAGGATCAAAAAATGAAGTATTTAAATTTCGATCTGTTAATAGTATAGTAATTGCTCCTGCTAATACTGGTAGTGATAAAAGAAGAAGAATAGTAGTAATAAAAATTGATCAGATAAAAAGAGAAATTTGATCAAATTTTAAAAATTTAATTTTTATATTTAATATTGTAGAAATAAAATTAATAGCTCCTAAAATTGATGAAATTCCTGCTATATGTAAAGAAAAAATAGAAAAATCTACTGATGTTCCAGTATGAGCAATAATTGAAGAAAGAGGGGGATATACAGTTCAACCTGTTCCTGTTCCTGTTTCTACTATTCTTCTAATTAATAATAAAGAAAT…
RorosAB_3	TGGGTGTCCAAAAAATCAAAATAGATGTTGGTAAAGAACTGGATCACCTCCTCCTATAGGGTCAAAAAATGAAGTATTTAAATTTCGATCTGTTAATAGTATAGTAATTGCTCCTGCTAATACTGGTAATGATAGTAGAAGAAGAATAGTAGTAATAAAAATTGATCAGATAAAAAGAGAAATTTGATCAAATTTTAAAAATTTAATTTTTATATTTAATATTGTAGAAATAAAATTAATAGCTCCTAAAATTGATGAAATTCCTGCTATATGTAAAGAAAAAATAGAAAAATCTACTGATGTTCCAGTATGAGCAATAATTGAAGAAAGAGGGGGGTATACAGTTCAACCTGTTCCTGTTCCTGTTTCTACTATTCTTCTAATTAATAATAAAGAAAT…
VilnaAB_1	TGGGTGTCCAAAAAATCAAAATAGATGCTGATAAAGAACTGGATCTCCTCCTCCTATAGGATCAAAAAATGAAGTATTTAAATTTCGATCTGTTAATAGTATAGTAATTGCTCCTGCTAATACTGGTAGTGATAAAAGAAGAAGAATAGTAGTAATAAAAATTGATCAGATAAAAAGAGAAATTTGATCAAATTTTAAAAATTTAATTTTTATATTTAATATTGTAGAAATAAAATTAATAGCTCCTAAAATTGATGAAATTCCTGCTATATGTAAAGAAAAAATAGAAAAATCTACTGATGTTCCAGTATGAGCAATAATTGAAGAAAGAGGGGGATATACAGTTCAACCTGTTCCTGTTCCTGTTTCTACTATTCTTCTAATTAATAATAAAGAAAT…
VilnaAB_2	TGGGTGTCCAAAAAATCAAAATAGATGCTGATAAAGAACTGGATCTCCTCCTCCTATAGGATCAAAAAATGAAGTATTTAAATTTCGATCTGTTAATAGTATAGTAATTGCTCCTGCTAATACTGGTAGTGATAAAAGAAGAAGAATAGTAGTAATAAAAATTGATCAGATAAAAAGAGAAATTTGATCAAATTTTAAAAATTTAATTTTTATATTTAATATTGTAGAAATAAAATTAATAGCTCCTAAAATTGATGAAATTCCTGCTATATGTAAAGAAAAAATAGAAAAATCTACTGATGTTCCAGTATGAGCAATAATTGAAGAAAGAGGGGGATATACAGTTCAACCTGTTCCTGTTCCTGTTTCTACTATTCTTCTAATTAATAATAAAGAAAT…
VilnaAB_3	TGGGTGTCCAAAAAATCAAAATAGATGATGATAAAGAACTGGATCTCCTCCTCCTATAGGATCAAAAAATGAAGTATTTAAATTTCGATCTGTTAATAGTATAGTAATTGCTCCTGCTAATACTGGTAGTGATAAAAGAAGAAGAATAGTAGTAATAAAAATTGATCAGATAAAAAGAGAAATTTGATCAAATTTTAAAAATTTAATTTTTATATTTAATATTGTAGAAATAAAATTAATAGCTCCTAAAATTGATGAAATTCCTGCTATATGTAAAGAAAAAATAGAAAAATCTACTGATGTTCCAGTATGAGCAATAATTGAAGAAAGAGGGGGATATACAGTTCAACCTGTTCCTGTTCCTGTTTCTACTATTCTTCTAATTAATAATAAAGAAAT…
WainwrightAB_1	TGGGTGTCCAAAAAATCAAAATAGATGCTGATAAAGAACTGGATCTCCTCCTCCTATGGGATCAAAAAATGAAGTATTTAAATTTCGATCTGTTAATAGTATAGTAATTGCTCCTGCTAATACTGGTAGTGATAAAAGAAGAAGAATAGTAGTAATAAAAATTGATCAGATAAAAAGAGAAATTTGATCAAATTTTAAAAATTTAATTTTTATATTTAATATTGTAGAAATAAAATTAATAGCTCCTAAAATTGATGAAATTCCTGCTATATGTAAAGAAAAAATAGAAAAATCTACTGATGTTCCAGTATGAGCAATAATTGAAGAAAGAGGGGGATATACAGTTCAACCTGTTCCTGTTCCTGTTTCTACTATTCTTCTAATTAATAATAAAGAAAT…
WainwrightAB_2	TGGGTGTCCAAAAAATCAAAATAGATGCTGATAAAGAACTGGATCTCCTCCTCCTATGGGATCAAAAAATGAAGTATTTAAATTTCGATCTGTTAATAGTATAGTAATTGCTCCTGCTAATACTGGTAGTGATAAAAGAAGAAGAATAGTAGTAATAAAAATTGATCAGATAAAAAGAGAAATTTGATCAAATTTTAAAAATTTAATTTTTATATTTAATATTGTAGAAATAAAATTAATAGCTCCTAAAATTGATGAAATTCCTGCTATATGTAAAGAAAAAATAGAAAAATCTACTGATGTTCCAGTATGAGCAATAATTGAAGAAAGAGGGGGATATACAGTTCAACCTGTTCCTGTTCCTGTTTCTACTATTCTTCTAATTAATAATAAAGAAAT…
WainwrightAB_3	TGGGTGTCCAAAAAATCAAAATAGATGCTGATAAAGAACTGGATCTCCTCCTCCTATGGGATCAAAAAATGAAGTATTTAAATTTCGATCTGTTAATAGTATAGTAATTGCTCCTGCTAATACTGGTAGTGATAAAAGAAGAAGAATAGTAGTAATAAAAATTGATCAGATAAAAAGAGAAATTTGATCAAATTTTAAAAATTTAATTTTTATATTTAATATTGTAGAAATAAAATTAATAGCTCCTAAAATTGATGAAATTCCTGCTATATGTAAAGAAAAAATAGAAAAATCTACTGATGTTCCAGTATGAGCAATAATTGAAGAAAGAGGGGGATATACAGTTCAACCTGTTCCTGTTCCTGTTTCTACTATTCTTCTAATTAATAATAAAGAAAT…
KM991223_Sitodiplosis_mosellana	------------------AAATAAATGTTGATAAAGAACTGGATCTCCTCCTCCTATAGGATCAAAAAATGATGTATTAAGATTTCGATCTGTTAATAATATAGTAATTGCTCCTGCTAATACTGGTAATGATAATAAAAGTAAAACTGTTGTAATTAAAATTGATCAAACAAATAATGAAATTTGATCAAATTTTAAAAATTTAATTTTTATATTTAATATAGTTGAAATAAAATTAATAGCTCCTAAAATTGA
KR946551_Sitodiplosis_mosellana	---------------------------------------------------------------------------------------------TAATAATATAGTAATTGCTCCTGCTAATACTGGTAATGATAATAAAAGTAAAACTGTTGTAATTAAAATTGATCAAACAAATAATGAAATTTGATCAAATTTTAAAAATTTAATTTTTATATTTAATATAGTTGAAATAAAATTAATAGCTCCTAAAATTGA
FN868640_Sitodiplosis_mosellana	TGGATGTCCAAAAAATCAAAATAAATGTTGATAAAGAACTGGATCTCCTCCTCCTATAGGATCAAAAAATGATGTATTAAGATTTCGATCTGTTAGTAATATAGTAATTGCTCCTGCTAATACTGGTAATGATAATAAAAGTAAAACTGTTGTAATTAAAATTGATCAAACAAATAATGAAATTTGATCAAATTTTAAAAATTTAATTTTTATATTTAATATAGTTGAAATAAAATTAATAGCTCCTAAAATTGAAGAAATTCCTGCAATATGAAGAGAAAAAATAGAAAAATCTACTGATGATCCTGTATGAGCAATAATAGATGAAAGGGGTGGATAAACTGTTCAACCAGTTCCGGTTCCAGTTTCTACTATTCTTCTAATTAATAATAAAGATAA…
FN868641_Sitodiplosis_mosellana	TGGATGTCCAAAGAATCAAAATAAATGTTGATAAAGAACTGGATCTCCTCCTCCTATAGGATCAAAAAATGATGTATTAAGATTTCGATCTGTTAATAATATAGTAATTGCTCCTGCTAATACTGGTAATGATAATAAAAGTAAAACTGTTGTAATTAAAATTGATCAAACAAATAATGAAATTTGATCAAATTTTAAAAATTTAATTTTTATATTTAATATAGTTGAAATAAAATTAATAGCTCCTAAAATTGAAGAAATTCCTGCAATATGAAGAGAAAAAATAGAAAAATCTACTGATGATCCTGTATGAGCAATAATAGATGAAAGGGGTGGATAAACTGTTCAACCAGTTCCTGTTCCAGTTTCTACTATTCTTCTAATTAATAATAAAGATAA…
